# Supplementary material for: Identification of One Major QTL and a Novel Gene OsIAA17q5 Associated with Tiller Number in Rice Using QTL Analysis
Source: MDPI journal article supplement (doi:10.3390/plants11040538), 2022-02-17
Supplement: s1 [file s1]

**Table S1.** Phenotypic values of tiller number in the CNDH lines and its parents, “Cheongcheong” and “Nagdong,” at nine different growth stages.

| Stage | Year | Parents      |            | DH Population |      |            |          |          |
|-------|------|--------------|------------|---------------|------|------------|----------|----------|
|       |      | Cheongcheong | Nagdong    | Max.          | Min. | Mean       | Skewness | Kurtosis |
| t1    | 2019 | 3.70±0.70    | 5.70±0.70  | 12.00         | 3.00 | 7.71±1.76  | -0.43    | -0.10    |
|       | 2020 | 4.00±0.60    | 5.30±0.50  | 12.00         | 3.00 | 7.64±1.94  | -0.26    | -0.37    |
| t2    | 2019 | 8.00±0.60    | 8.70±0.70  | 15.20         | 3.00 | 9.64±2.22  | -0.45    | 0.29     |
|       | 2020 | 8.30±0.90    | 7.00±0.60  | 15.70         | 3.30 | 9.82±2.22  | -0.30    | 0.21     |
| t3    | 2019 | 10.00±0.60   | 9.70±0.90  | 17.00         | 3.30 | 10.58±2.40 | -0.32    | 0.58     |
|       | 2020 | 10.70±0.50   | 9.70±0.50  | 16.30         | 3.30 | 10.96±2.34 | -0.39    | 0.68     |
| t4    | 2019 | 13.00±0.60   | 9.70±0.90  | 17.70         | 3.30 | 11.41±2.53 | -0.35    | 0.54     |
|       | 2020 | 12.70±1.10   | 10.00±0.60 | 17.70         | 4.00 | 12.02±2.45 | -0.47    | 0.77     |
| t5    | 2019 | 13.00±0.60   | 11.30±0.50 | 18.00         | 3.80 | 11.41±2.53 | -0.35    | 0.54     |
|       | 2020 | 13.30±0.70   | 11.70±0.70 | 18.30         | 4.30 | 12.02±2.45 | -0.47    | 0.77     |
| t6    | 2019 | 14.00±1.00   | 11.30±0.50 | 19.30         | 4.00 | 12.37±2.59 | -0.29    | 1.23     |
|       | 2020 | 13.70±0.50   | 11.70±0.50 | 20.00         | 4.00 | 12.56±2.74 | -0.29    | 0.91     |
| t7    | 2019 | 13.00±0.60   | 11.00±0.60 | 17.70         | 3.70 | 11.59±2.46 | -0.34    | 0.47     |
|       | 2020 | 13.30±0.50   | 10.70±0.50 | 19.30         | 3.70 | 11.95±2.69 | -0.27    | 0.70     |
| t8    | 2019 | 12.30±0.50   | 9.00±1.20  | 15.00         | 3.70 | 11.06±2.36 | -0.45    | 0.22     |
|       | 2020 | 13.00±0.60   | 9.70±0.90  | 18.50         | 3.30 | 11.39±2.57 | -0.38    | 0.58     |
| t9    | 2019 | 12.00±0.60   | 9.00±0.80  | 15.00         | 3.30 | 10.59±2.29 | -0.41    | 0.36     |
|       | 2020 | 12.70±0.50   | 9.70±0.70  | 17.70         | 3.30 | 10.95±2.46 | -0.33    | 0.43     |

Data are presented as mean ± standard deviation. The tiller number of each plant was investigated every 7 days from 30 days after transplanting (denoted as t1, t2, t3, t4, t5, t6, t7, t8, and t9, respectively).

**Table S2.** QTL related to tiller number at different growth stages in the CNDH lines.

| Stage <sup>a</sup> | Year | Chromosome | Marker Interval <sup>b</sup> | LOD  | Add. Effect <sup>c</sup> | R <sup>2</sup> <sup>d</sup> | Increasing Effect <sup>e</sup> |
|--------------------|------|------------|------------------------------|------|--------------------------|-----------------------------|--------------------------------|
| t1                 | 2019 | 5          | RM5311-RM4691                | 2.84 | -0.84                    | 0.35                        | Nagdong                        |
|                    |      | 5          | RM18130-RM3381               | 3.60 | 0.92                     | 0.32                        | Cheongcheong                   |
|                    | 2020 | 1          | RM3482-RM11966               | 2.57 | 0.75                     | 0.33                        | Cheongcheong                   |
|                    |      | 5          | RM5311-RM4691                | 3.21 | 0.90                     | 0.34                        | Cheongcheong                   |
| t2                 | 2019 | 5          | RM18130-RM3381               | 3.28 | -0.89                    | 0.33                        | Nagdong                        |
|                    |      | 3          | RM15063-RM6266               | 4.26 | 1.14                     | 0.34                        | Cheongcheong                   |
|                    |      | 5          | RM5311-RM440                 | 4.25 | 1.13                     | 0.35                        | Cheongcheong                   |
|                    | 2020 | 6          | RM19621-RM50                 | 2.53 | -0.81                    | 0.34                        | Nagdong                        |
|                    |      | 3          | RM15063-RM6266               | 3.92 | 1.12                     | 0.33                        | Cheongcheong                   |
|                    |      | 5          | RM5311-RM440                 | 4.42 | 1.17                     | 0.33                        | Cheongcheong                   |
| t3                 | 2019 | 2          | RM12915-RM12879              | 2.72 | 1.19                     | 0.36                        | Cheongcheong                   |
|                    |      | 5          | RM5311-RM440                 | 3.86 | 1.09                     | 0.39                        | Cheongcheong                   |
|                    |      | 5          | RM18130-RM3381               | 3.48 | -0.96                    | 0.36                        | Nagdong                        |
|                    | 2020 | 2          | RM12915-RM12879              | 2.74 | 1.25                     | 0.36                        | Cheongcheong                   |
|                    |      | 5          | RM5311-RM440                 | 3.67 | 1.07                     | 0.36                        | Cheongcheong                   |
|                    |      | 5          | RM18130-RM3381               | 3.15 | -0.97                    | 0.36                        | Nagdong                        |
| t4                 | 2019 | 1          | RM1297-RM8111                | 3.58 | 0.89                     | 0.37                        | Cheongcheong                   |
|                    |      | 5          | RM5311-RM440                 | 3.45 | -0.81                    | 0.37                        | Nagdong                        |
|                    |      | 5          | RM18130-RM3381               | 3.87 | 0.86                     | 0.36                        | Cheongcheong                   |
|                    | 2020 | 8          | RM23230-RM23191              | 3.42 | 0.85                     | 0.37                        | Cheongcheong                   |
|                    |      | 1          | RM3530-RM8111                | 2.51 | 0.74                     | 0.34                        | Cheongcheong                   |
|                    |      | 5          | RM5311-RM440                 | 3.02 | -0.78                    | 0.34                        | Nagdong                        |
| t5                 | 2019 | 5          | RM18130-RM3381               | 3.49 | 0.85                     | 0.34                        | Cheongcheong                   |
|                    |      | 5          | RM18130-RM3381               | 4.48 | 1.06                     | 0.33                        | Cheongcheong                   |
|                    |      | 6          | RM20017-RM217                | 2.68 | 0.89                     | 0.35                        | Cheongcheong                   |
|                    | 2020 | 8          | RM44-RM72                    | 3.26 | 0.83                     | 0.34                        | Cheongcheong                   |
|                    |      | 5          | RM18130-RM3381               | 4.50 | 1.06                     | 0.33                        | Cheongcheong                   |
|                    |      | 6          | RM20017-RM217                | 2.86 | 1.00                     | 0.37                        | Cheongcheong                   |
| t6                 | 2019 | 8          | RM44-RM72                    | 2.80 | 0.76                     | 0.33                        | Cheongcheong                   |
|                    |      | 3          | RM15749-RM15689              | 2.61 | 1.08                     | 0.22                        | Cheongcheong                   |
|                    |      | 5          | RM18130-RM3381               | 3.71 | 1.31                     | 0.22                        | Cheongcheong                   |

|    |      |   |                |      |       |      |              |
|----|------|---|----------------|------|-------|------|--------------|
| t7 | 2020 | 5 | RM18130-RM3381 | 3.59 | 1.31  | 0.22 | Cheongcheong |
|    | 2019 | 5 | RM5311-RM440   | 2.54 | 0.86  | 0.33 | Cheongcheong |
|    |      | 5 | RM18130-RM3381 | 2.71 | -0.80 | 0.31 | Nagdong      |
|    |      | 8 | RM72-RM22861   | 2.56 | 0.78  | 0.32 | Cheongcheong |
|    | 2020 | 5 | RM18130-RM3381 | 3.59 | 0.95  | 0.27 | Cheongcheong |
| t8 |      | 8 | RM149-RM3689   | 2.95 | 0.96  | 0.34 | Cheongcheong |
|    | 2019 | 5 | RM18130-RM3381 | 2.82 | 0.75  | 0.29 | Cheongcheong |
|    |      | 7 | RM21438-RM1364 | 2.52 | 0.94  | 0.37 | Cheongcheong |
|    |      | 8 | RM44-RM22861   | 3.98 | 0.87  | 0.32 | Cheongcheong |
|    | 2020 | 5 | RM18130-RM3381 | 3.19 | 0.80  | 0.29 | Cheongcheong |
| t9 |      | 8 | RM23191-RM44   | 3.55 | 0.83  | 0.31 | Cheongcheong |
|    | 2019 | 5 | RM18130-RM3381 | 5.94 | 1.11  | 0.29 | Cheongcheong |
|    | 2020 | 5 | RM18130-RM3381 | 5.76 | 1.13  | 0.30 | Cheongcheong |

<sup>a</sup> The tiller number of each plant was investigated every 7 days from 30 days after transplanting (denoted as t1, t2, t3, t4, t5, t6, t7, t8, and t9, respectively).

<sup>b</sup> Marker Interval are those within the significance threshold on each border of the QTL range.

<sup>c</sup> Additive effect.

<sup>d</sup> Phenotypic variation explains each QTL.

<sup>e</sup> Increase effect is the source of the allele causing an increase in the measured traits.

**Table S3.** Candidate genes from the target interval RM18130-RM3381 on chromosome 5 related to tiller number in the CNDH lines.

| Locus ID     | Description                                                                               |
|--------------|-------------------------------------------------------------------------------------------|
| Os05g0223000 | Similar to Calmodulin-related protein (Fragment).                                         |
| Os05g0223200 | Similar to Glycine-rich RNA-binding protein GRP2A.                                        |
| Os05g0223300 | Similar to RNA-binding protein.                                                           |
| Os05g0224700 | RNA polymerase Rpb7, N-terminal domain containing protein.                                |
| Os05g0224800 | Similar to Modification methyltransferase, cytosine-specific.                             |
| Os05g0225800 | Similar to Szp protein.                                                                   |
| Os05g0227600 | Quinonprotein alcohol dehydrogenase-like domain containing protein.                       |
| Os05g0227800 | Homeodomain-like containing protein.                                                      |
| Os05g0228000 | Purine and other phosphorylases, family 1 protein.                                        |
| Os05g0228400 | Helix-loop-helix DNA-binding domain containing protein.                                   |
| Os05g0229000 | D111/G-patch domain containing protein.                                                   |
| Os05g0230600 | Protein of unknown function DUF1620 domain containing protein.                            |
| Os05g0230700 | Similar to Auxin-responsive protein (Aux/IAA) (Fragment).                                 |
| Os05g0230900 | Similar to Glyoxalase I.                                                                  |
| Os05g0231600 | Similar to Aquaglyceroporin (Tonoplast intrinsic protein (Tipa)).                         |
| Os05g0231700 | Similar to Tonoplast membrane integral protein ZmTIP4-2.                                  |
| Os05g0231900 | Similar to Peroxidase 29 precursor (EC 1.11.1.7) (Atperox P29) (ATP40).                   |
| Os05g0232500 | Ubiquitin-conjugating enzyme, E2 domain containing protein.                               |
| Os05g0233900 | Zinc finger, TTF-type domain containing protein.                                          |
| Os05g0234700 | Zinc finger, TTF-type domain containing protein.                                          |
| Os05g0235300 | Armadillo-like helical domain containing protein.                                         |
| Os05g0235800 | MCM protein 6 family protein.                                                             |
| Os05g0237100 | Similar to Type A-like cyclin.                                                            |
| Os05g0237300 | Non-protein coding transcript, unclassifiable transcript.                                 |
| Os05g0237400 | Similar to Viroid symptom modulation protein.                                             |
| Os05g0237700 | Terpenoid cylases/protein prenyltransferase alpha-alpha toroid domain containing protein. |
| Os05g0238200 | Similar to Ubiquitin ligase SINAT5 (EC 6.3.2.-) (Seven in absentia homolog 5).            |
| Os05g0238400 | Harpin-induced 1 domain containing protein.                                               |
| Os05g0239200 | Non-protein coding transcript, unclassifiable transcript.                                 |

|              |                                                                                   |
|--------------|-----------------------------------------------------------------------------------|
| Os05g0240200 | Similar to CTV.2.                                                                 |
| Os05g0241000 | Prefoldin domain containing protein.                                              |
| Os05g0241100 | Similar to Leucyl-tRNA synthetase, cytoplasmic (Leucine--tRNA ligase) (LeuRS).    |
| Os05g0241200 | Similar to Phosphate translocator (Fragment).                                     |
| Os05g0241900 | Retrotransposon gag protein family protein.                                       |
| Os05g0242000 | Protein of unknown function DUF247, plant family protein.                         |
| Os05g0242600 | Prefoldin domain containing protein.                                              |
| Os05g0243200 | Similar to Ribosomal protein L13.                                                 |
| Os05g0243300 | Similar to 50S ribosomal protein L13.                                             |
| Os05g0244500 | Glycoside hydrolase, family 5 protein.                                            |
| Os05g0244600 | Nucleic acid-binding, OB-fold domain containing protein.                          |
| Os05g0244700 | Aminotransferase, class IV family protein.                                        |
| Os05g0245300 | Protein of unknown function DUF588 family protein.                                |
| Os05g0246300 | Expansin/Lol pI family protein.                                                   |
| Os05g0246600 | Protein kinase domain containing protein.                                         |
| Os05g0247100 | Similar to Chitinase (EC 3.2.1.14) III C00481-rice (EC 3.2.1.14).                 |
| Os05g0247500 | Glycoside hydrolase, family 18 protein.                                           |
| Os05g0247600 | RNA-directed DNA polymerase (Reverse transcriptase) domain containing protein.    |
| Os05g0247800 | Glycoside hydrolase, family 18 protein.                                           |
| Os05g0247900 | DEAD/DEAH box helicase, N-terminal domain containing protein.                     |
| Os05g0248200 | Glycoside hydrolase, family 18 protein.                                           |
| Os05g0250700 | Ribosomal protein L13 family protein.                                             |
| Os05g0251500 | Similarities with spP29295 Saccharomyces cerevisiaeYPL204w HRR25 casein kinase I. |
| Os05g0251900 | Oligopeptide transporter OPT superfamily protein.                                 |
| Os05g0252000 | Oligopeptide transporter OPT superfamily protein.                                 |
| Os05g0252100 | Protein of unknown function DUF620 family protein.                                |
| Os05g0253200 | Protein kinase-like domain containing protein.                                    |
| Os05g0255600 | Thioredoxin domain 2 containing protein.                                          |
| Os05g0256000 | Similar to TGF-beta receptor-interacting protein 1.                               |
| Os05g0256100 | Serine/threonine protein kinase domain containing protein.                        |
| Os05g0256500 | Protein kinase domain containing protein.                                         |
| Os05g0257100 | Leucine-rich repeat, plant specific containing protein.                           |

---

**Table S4.** List of primers used in this study.

| <b>Name</b>      | <b>Forward primer (5'-3')</b> | <b>Reverse primer (5'-3')</b> |
|------------------|-------------------------------|-------------------------------|
| <i>OsIAA17q5</i> | TGAAGAGCAGCAAGGAGGAT          | CGGCTCTCAGATAAGCCATC          |
| <i>OsActin</i>   | CCCTCCTGAAAGGAAGTACAGTGT      | GTCCGAAGAATTAGAAGCATTTC       |
